# Supplementary material for: lociNGS: A Lightweight Alternative for Assessing Suitability of Next-Generation Loci for Evolutionary Analysis
Source: PubMed Central journal article supplement (PMC3468592; doi:10.1371/journal.pone.0046847), 2012-10-10
Supplement: pone.0046847.s001.pdf [file pone.0046847.s001.pdf]

Table S1: Expected Results From Test Data Included With lociNGS

\*These are fake data with no biological meaning, but confirm that the program is properly installed. The screens should look like Figure 1A and 1B from the main text (Hird 2012).

| Summary screen | Individual | Population | numLoci | totalReads | usedReads | percentUsed | Longitude | Latitude | Location    | Species       |
|----------------|------------|------------|---------|------------|-----------|-------------|-----------|----------|-------------|---------------|
|                | testA      | POP1       | 5       | 3472       | 1272      | 36          | -109.876  | 45.678   | NoPlace, TX | Tamias bunkus |
|                | testB      | POP2       | 4       | 1753       | 659       | 37          | -109.876  | 45.678   | NoPlace, TX | Tamias bunkus |
|                | testC      | POP1       | 5       | 5138       | 1881      | 36          | -109.876  | 45.678   | NoPlace, TX | Tamias bunkus |
|                | testD      | POP3       | 5       | 2139       | 593       | 27          | -109.876  | 45.678   | NoPlace, TX | Tamias tamias |

**Individual screens**

| testA | Locus Name | Length | SNPs | Coverage_This_Ind | Number_Inds | Coverage_Total | Coverage_Used |
|-------|------------|--------|------|-------------------|-------------|----------------|---------------|
|       | false_1    | 136    | 1    | 170.0             | 3           | 630.0          | 630.0         |
|       | false_2    | 145    | 0    | 31.0              | 4           | 81.0           | 74.0          |
|       | false_3    | 282    | 4    | 210.0             | 4           | 720.0          | 720.0         |
|       | false_4    | 191    | 1    | 250.0             | 4           | 761.0          | 761.0         |
|       | false_5    | 177    | 7    | 180.0             | 4           | 260.0          | 260.0         |

| testB | Locus Name | Length | SNPs | Coverage_This_Ind | Number_Inds | Coverage_Total | Coverage_Used |
|-------|------------|--------|------|-------------------|-------------|----------------|---------------|
|       | false_1    | 136    | 1    | 170.0             | 3           | 630.0          | 630.0         |
|       | false_3    | 282    | 4    | 210.0             | 4           | 720.0          | 720.0         |
|       | false_4    | 191    | 1    | 250.0             | 4           | 761.0          | 761.0         |
|       | false_5    | 177    | 7    | 180.0             | 4           | 260.0          | 260.0         |

| testC | Locus Name | Length | SNPs | Coverage_This_Ind | Number_Inds | Coverage_Total | Coverage_Used |
|-------|------------|--------|------|-------------------|-------------|----------------|---------------|
|       | false_1    | 136    | 1    | 170.0             | 3           | 630.0          | 630.0         |
|       | false_2    | 145    | 0    | 31.0              | 4           | 81.0           | 74.0          |
|       | false_3    | 282    | 4    | 210.0             | 4           | 720.0          | 720.0         |
|       | false_4    | 191    | 1    | 250.0             | 4           | 761.0          | 761.0         |
|       | false_5    | 177    | 7    | 180.0             | 4           | 260.0          | 260.0         |

| testD | Locus Name | Length | SNPs | Coverage_This_Ind | Number_Inds | Coverage_Total | Coverage_Used |
|-------|------------|--------|------|-------------------|-------------|----------------|---------------|
|       | false_1    | 136    | 1    | 170.0             | 3           | 630.0          | 630.0         |
|       | false_2    | 145    | 0    | 31.0              | 4           | 81.0           | 74.0          |
|       | false_3    | 282    | 4    | 210.0             | 4           | 720.0          | 720.0         |
|       | false_4    | 191    | 1    | 250.0             | 4           | 761.0          | 761.0         |
|       | false_5    | 177    | 7    | 180.0             | 4           | 260.0          | 260.0         |
